# Supplementary material
Source: PubMed Central journal article supplement (PMC2997213)
Supplement: NIHMS234228-supplement-02.pdf [file NIHMS234228-supplement-02.pdf]

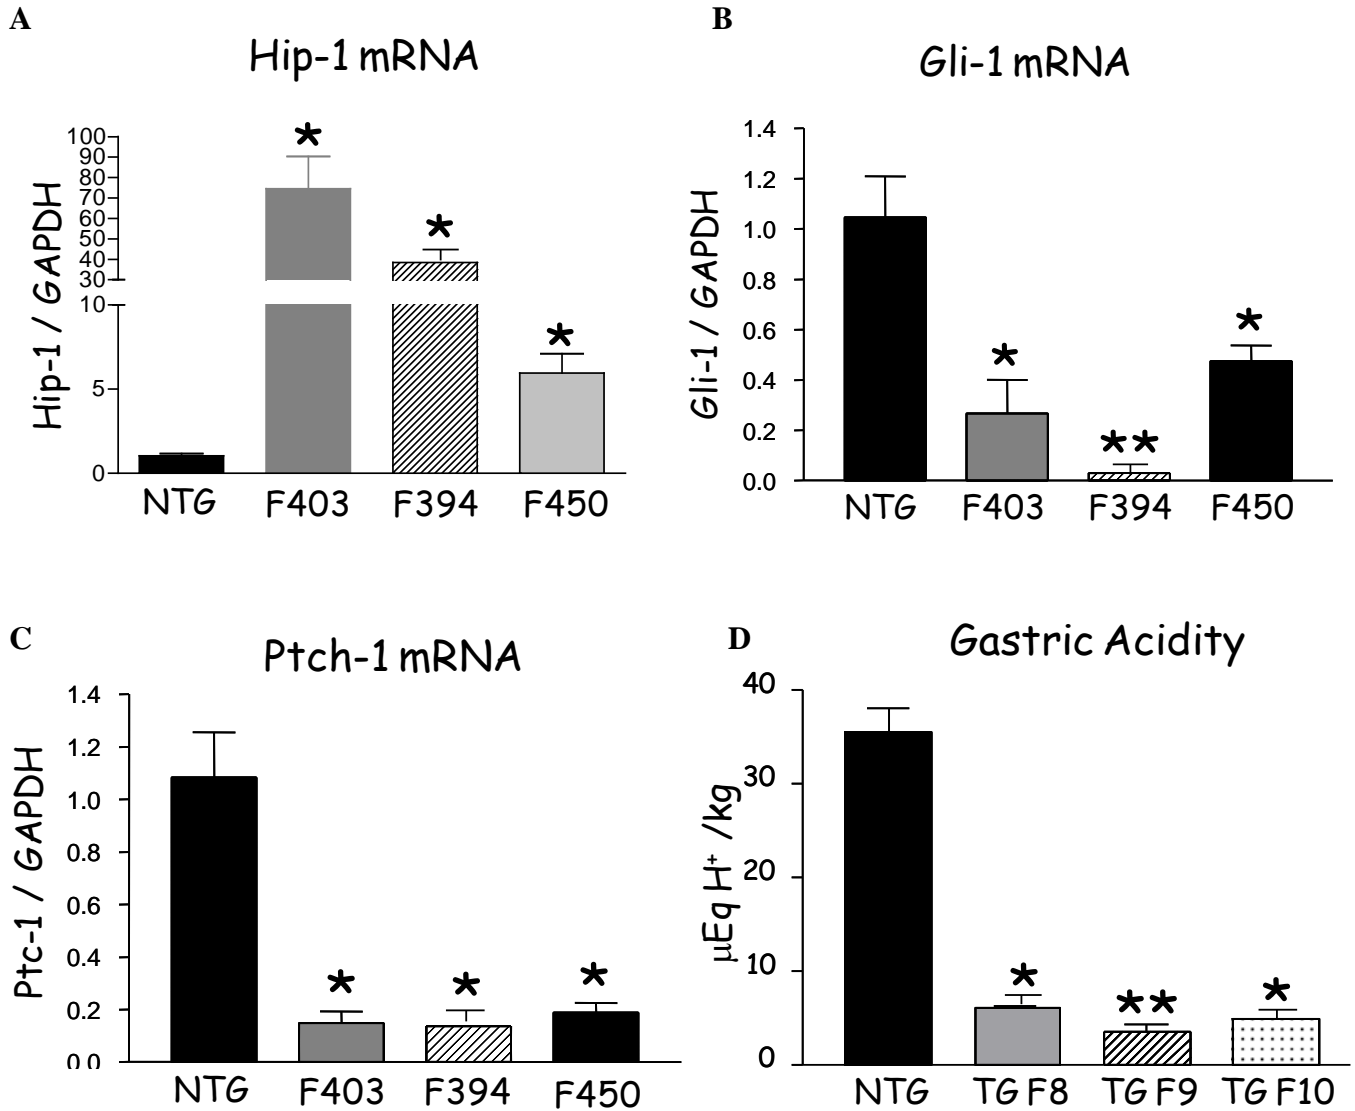

**Supplementary Figure 1. Comparison of different sHip-1 founder lines.** RT-qPCR of Hip-1 (A), Gli-1 (B), and Ptch-1 (C) in the fundus of nontransgenic versus 3 different sHip-1 founder lines. D) Gastric acidity by base titration is shown for 3 different sHip-1 founder lines versus non-transgenic controls (NTG). Error bars represent SEM. \*  $P < 0.05$  and \*\*  $P < 0.01$ .

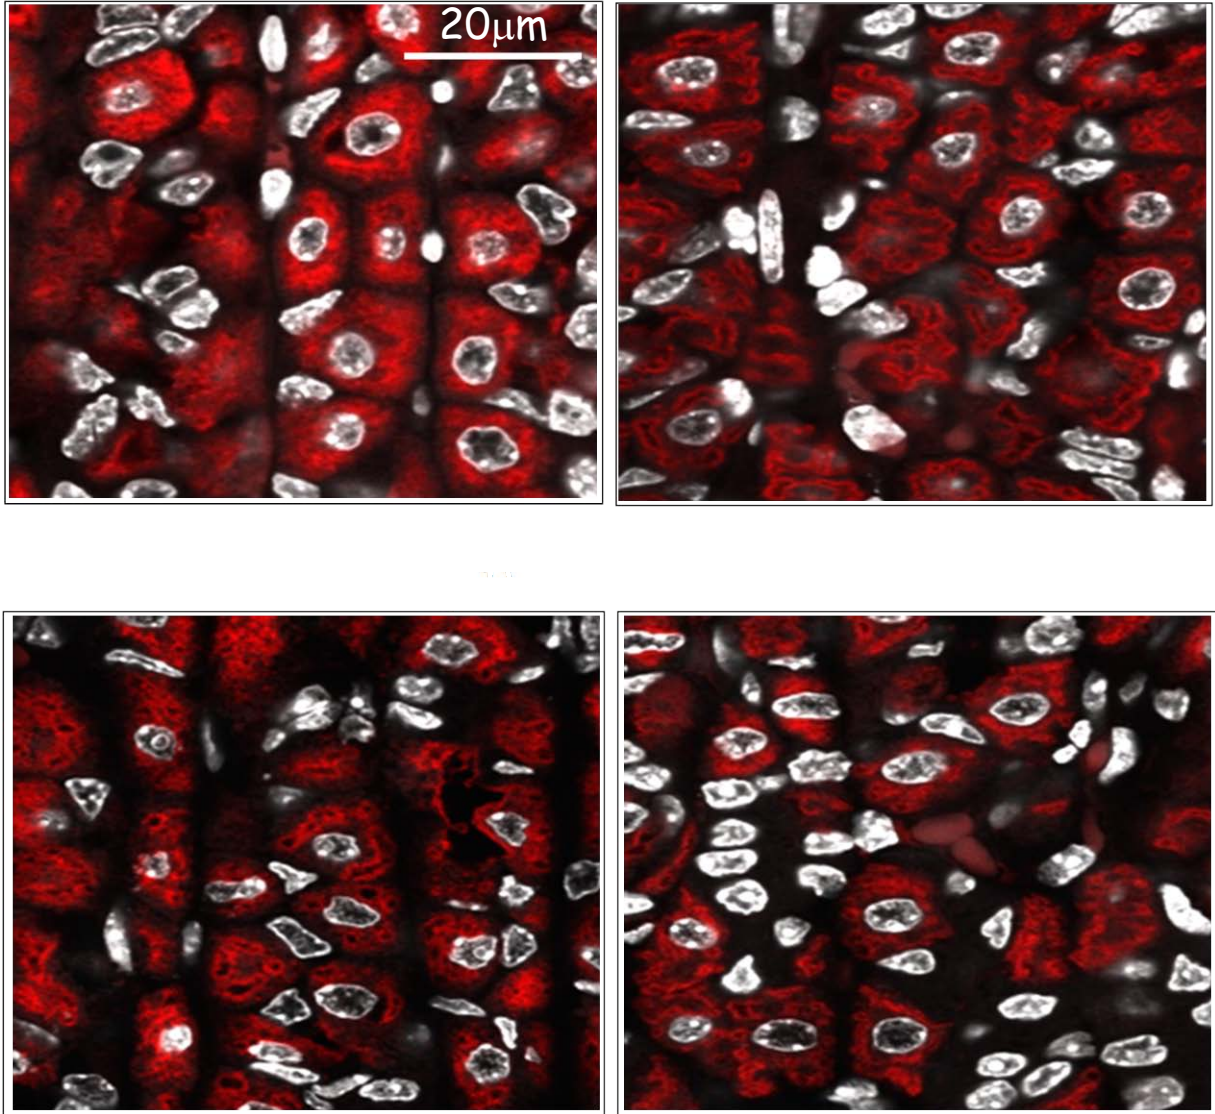

**Supplementary Figure 2. H<sup>+</sup>/K<sup>+</sup>-ATPase-β immunofluorescence in sHip-1 mice.** H<sup>+</sup>/K<sup>+</sup>-ATPase staining (red) in 3 different sHip-1 founder lines (F403, F394, F450) versus a non-transgenic control (NTG). The fold increase in Hip-1 mRNA is indicated in parentheses. Staining was visualized by confocal microscopy. The nuclei are counterstained with DAPI (pseudocolored in grey).

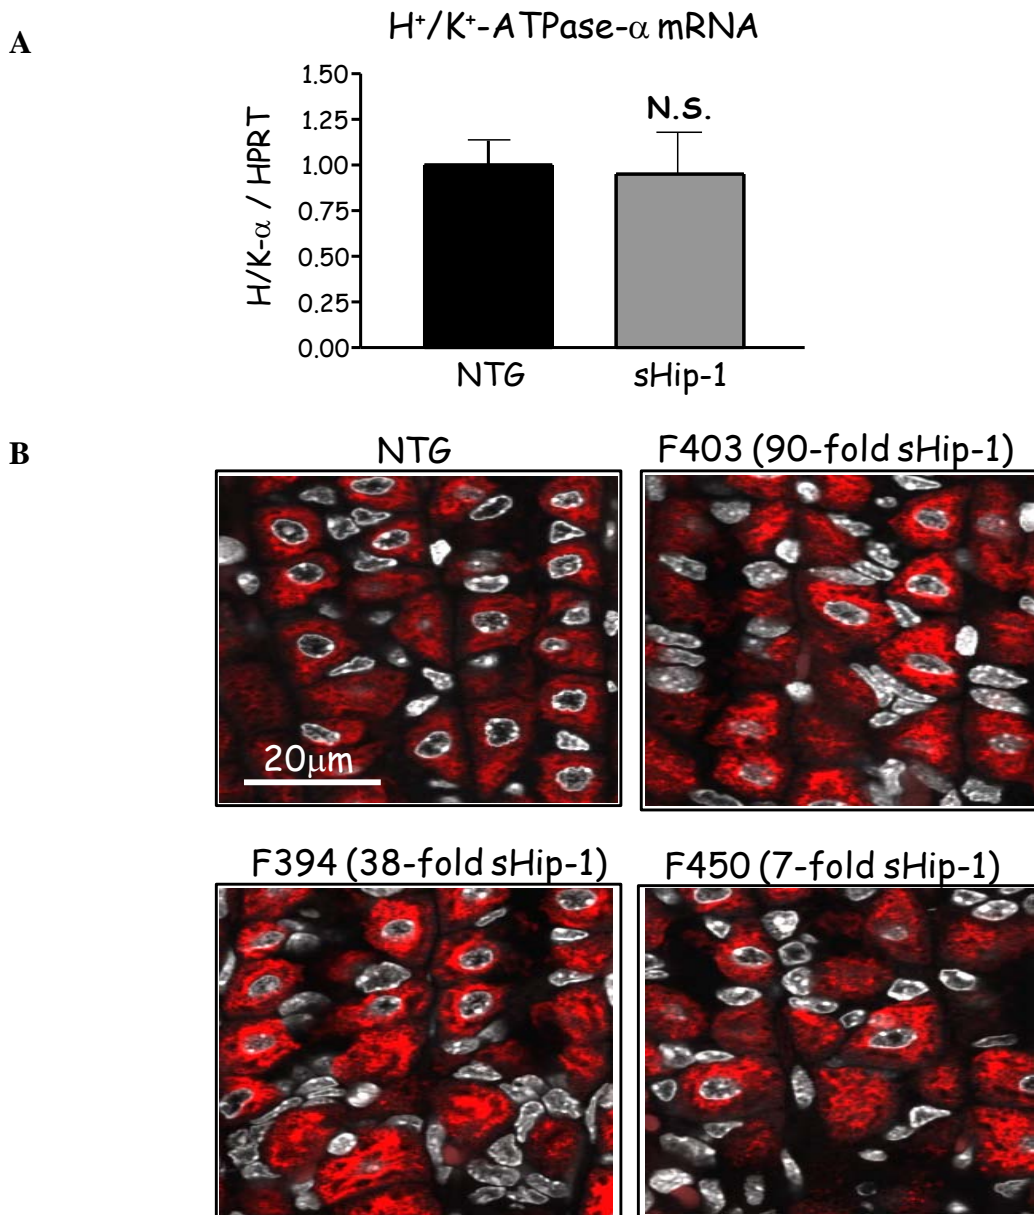

**Supplementary Figure 3. H<sup>+</sup>/K<sup>+</sup>-ATPase- $\alpha$  RT-qPCR and immunofluorescence in sHip-1 mice.** A) RT-qPCR of H<sup>+</sup>/K<sup>+</sup>-ATPase- $\alpha$  subunit mRNA expression in sHip-1 versus non-transgenic littermate. B) H<sup>+</sup>/K<sup>+</sup>-ATPase- $\alpha$  staining (red) for 3 different sHip-1 founder mouse lines (F403, F394, F450) versus a non-transgenic control (NTG). The fold increase in Hip-1 mRNA over NTG levels is shown. Staining was visualized by confocal microscopy. The nuclei are counterstained with DAPI (pseudocolored in grey).

**A**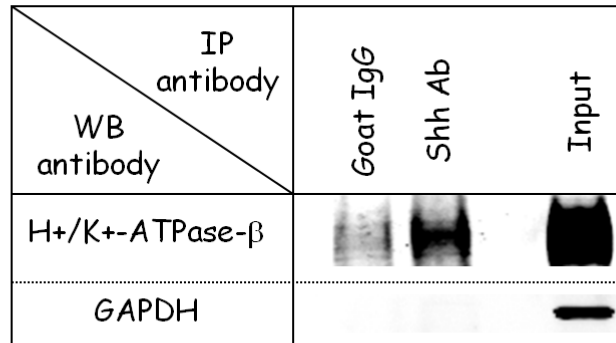**B**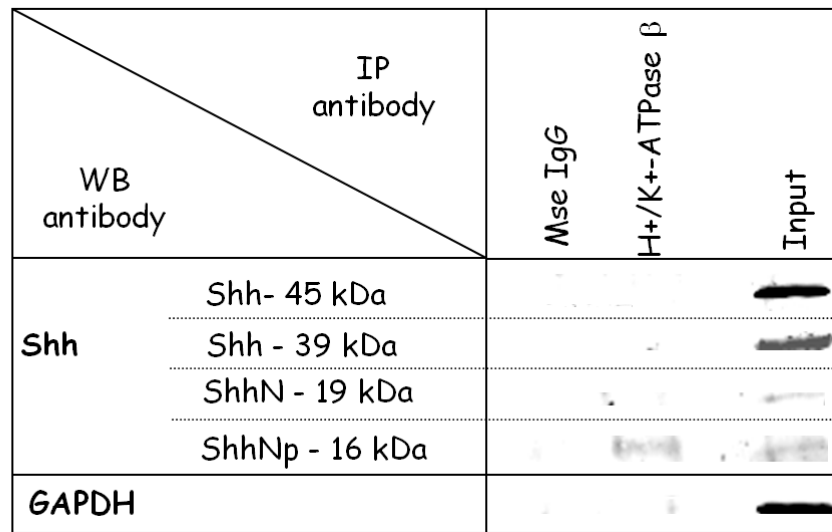

**Supplementary Figure 4. Co-immunoprecipitation of H<sup>+</sup>/K<sup>+</sup>-ATPase and Shh from gastric lysates.** A) Immunoprecipitation of Shh peptide from gastric lysates using goat polyclonal Shh antibody (N-19) versus concentration-matched goat IgG. The immunoprecipitate was probed with H<sup>+</sup>/K<sup>+</sup>-ATPase-β subunit antibody on a western blot. B) Immunoprecipitation of H<sup>+</sup>/K<sup>+</sup>-ATPase-β protein using H<sup>+</sup>/K<sup>+</sup>-ATPase-β antibody versus concentration-matched mouse IgG. The Shh forms were detected by western blot using Shh antibody (N-19). Shh-45kDa is the full-length protein; Shh-39kDa is the protein minus the signal peptide; ShhN-19kDa and ShhNp-16kDa are the N-terminally processed and presumed lipid-modified forms.

A

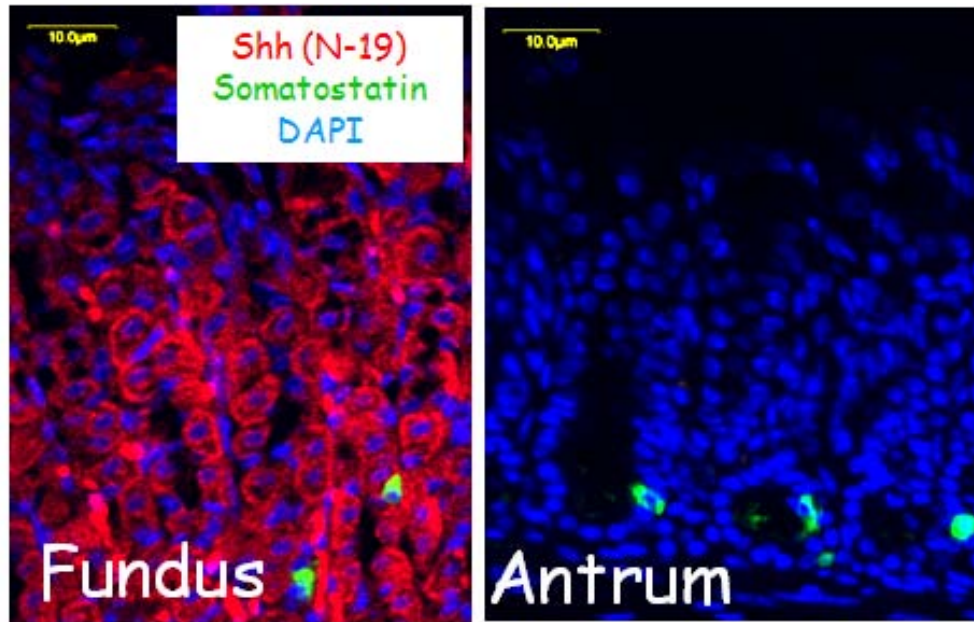

B

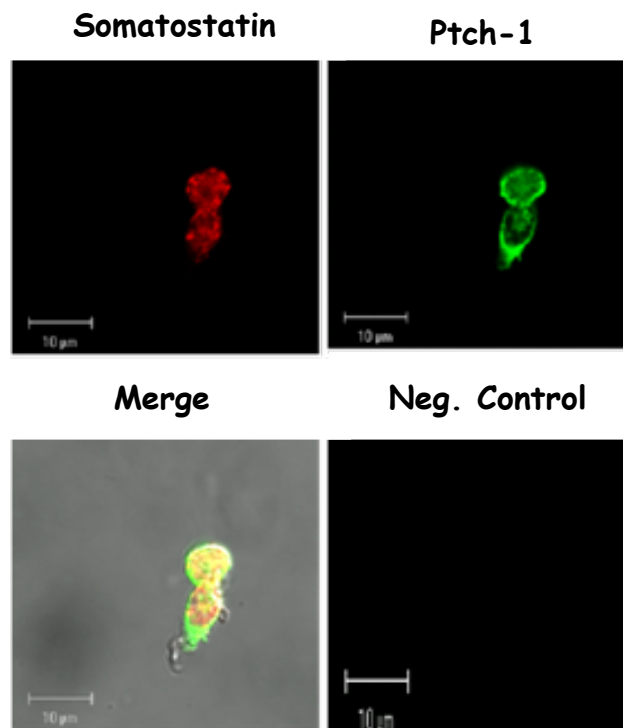

**Supplementary Figure 5. D-cells express Ptch-1 receptor but not Shh.** A) Immunofluorescence for somatostatin (green) and Shh (red) in the gastric fundus and antrum. B) Immunofluorescence for somatostatin (red) and Ptch-1 (green) in an enriched culture of canine D-cells.

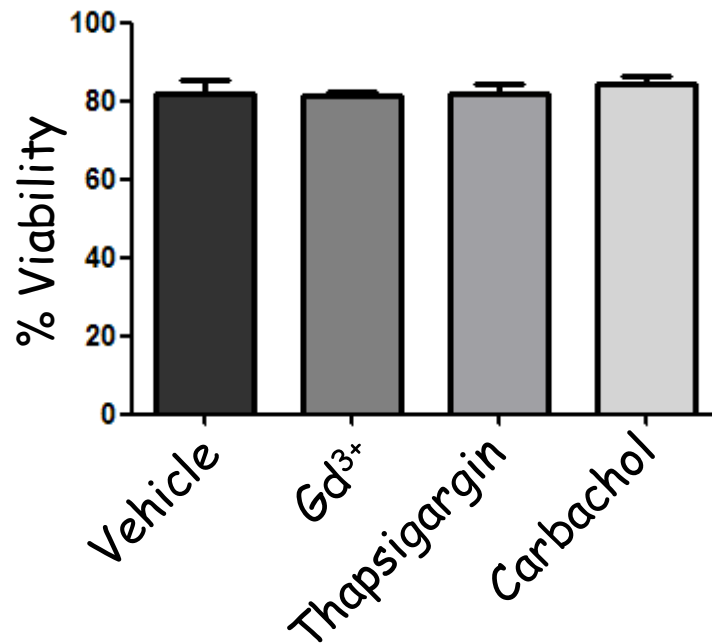

**Supplementary Figure 6. Trypan blue viability assay.** Trypan blue viability assay of mouse primary gastric cultures treated with vehicle, Gd<sup>3+</sup>, thapsigargin or Carbachol for 6 h. Bar graphs represent the percentage of trypan blue-negative cells over the total cell number. Three experiments were performed in duplicate. Shown is the mean +/- SEM.



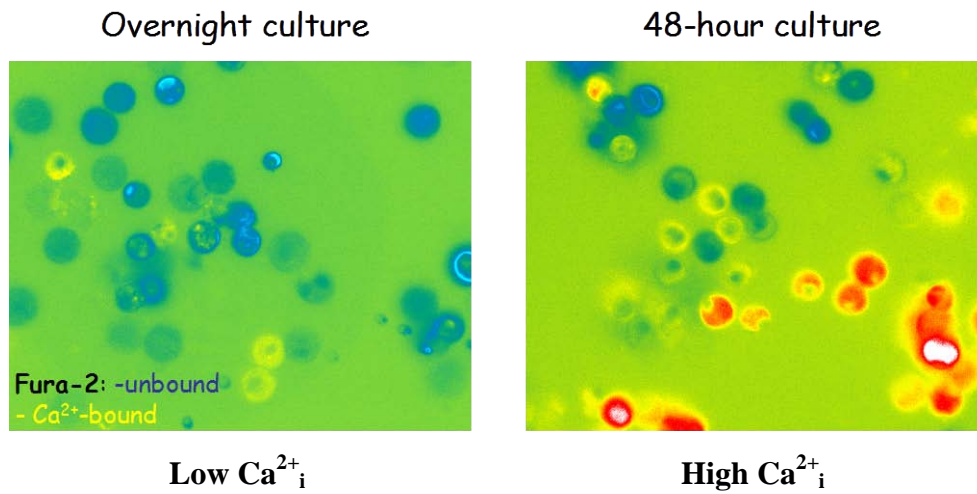

**Supplementary Figure 7. Ca<sup>2+</sup><sub>(i)</sub> levels in parietal cells at 24 and 48 hours post-culture.** Fura-2 imaging of canine parietal cells cultured for 24 h (left panel) and 48 h (right panel). The blue and yellow/red signals indicate low and high intracellular calcium-binding to Fura-2 respectively.

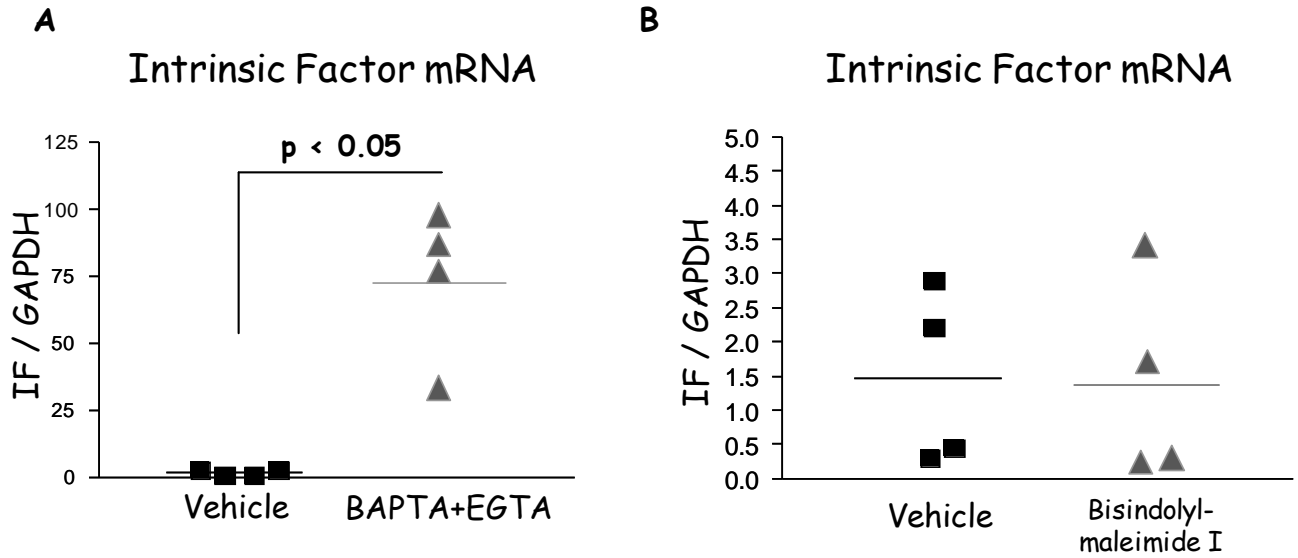

**Supplementary Figure 8. Intrinsic factor gene expression after  $\text{Ca}^{2+}_{(i)}$  chelation or PKC inhibition.** Intrinsic factor expression in response to EGTA plus BAPTA-AM ( $p < 0.05$ ) (A) and Bisindolylmaleimide I (P-value not significant) (B) in mouse fundic organ cultures determined by RT-qPCR. Each datapoint corresponds to one mouse.



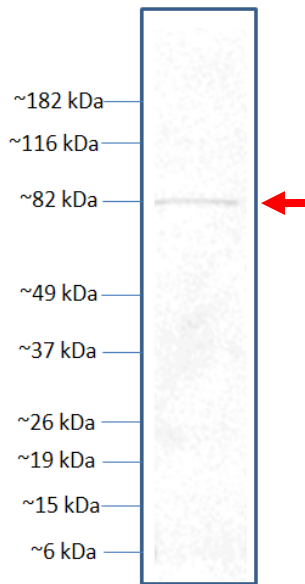

**Supplementary Figure 9.** Activated PKC $\alpha$ / $\beta$  protein expression in isolated canine parietal cells (~80kDa). The antibody detects PKC $\alpha$  at phosphorylation site threonine-638 and PKC $\beta$ <sub>II</sub> at phosphorylation site threonine-641. Canine parietal cell extract was resolved on a 4-20% Tris-Glycine gradient gel, blotted on a PVDF membrane, and probed with phospho-PKC $\alpha$ / $\beta$ <sub>II</sub> (Thr638/641) antibody (#9375, Cell Signaling, Boston, MA).

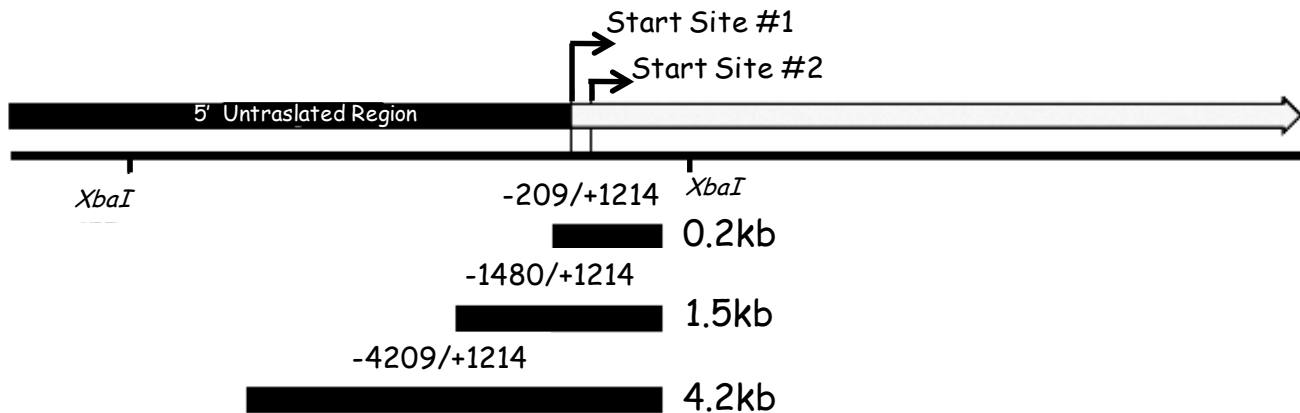

**Supplementary Figure 10.** Diagram illustrating the Shh sequences inserted into the pGL3-basic luciferase-reporter vector. The promoter sequence for Shh has been previously described and is reported to have two transcriptional start sites<sup>1</sup>. The 3 bars indicate the positions of the 0.2kb, 1.5kb, and 4.2kb DNA promoter segments used in the luciferase reporter constructs.

## References

1. Kitazawa S, Kitazawa R, Tamada H, Maeda S. Promoter structure of human sonic hedgehog gene. *Biochim Biophys Acta* 1998;1443:358-63.
